# Supplementary material
Source: Springer Nature journal article supplement (https://www.springermedizin.de/resource/supplementary/12986_2005_58_MOESM2_ESM.pdf/25655362)
Supplement: MOESM2 [file 25655362]

# Study Design:

8 weeks

4 weeks

## *Very Low Carbohydrate Diet (VLCARB)*

weight loss

weight stable

## *Very Low Fat Diet (VLF)*

weight loss

weight stable

## *High Unsaturated Fat Diet (HUF)*

weight loss

weight stable

U  
MTT  
GTT  
DXA

U  
MTT  
GTT  
DXA
